# Supplementary figures and images for: Spatiotemporal Characteristics and meteorological determinants of Hand, Foot and Mouth Disease in Shaanxi Province, China: a county-level analysis
Source: Research Square preprint supplement (doi:10.21203/rs.3.rs-19793/v3), 2021-01-11

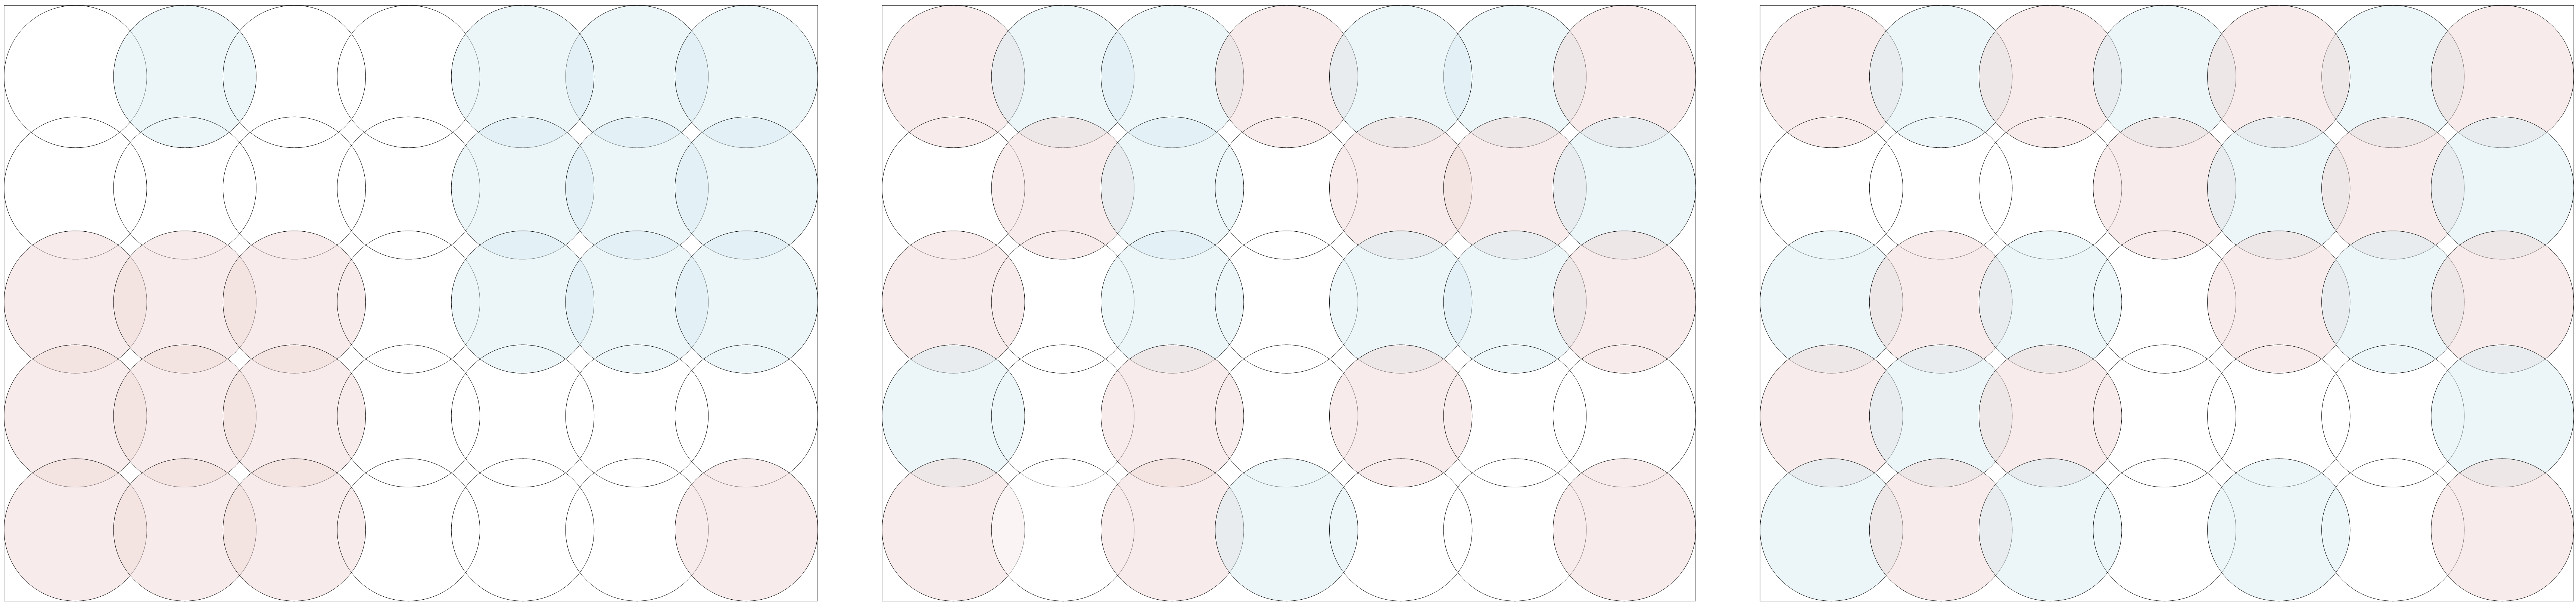


Appendix 2 Demonstration of different type spatial cluster

Supplement: Supplementary file 1 [file e28ce508dcff640394d60dff.docx]
